# Supplementary material for: Kinetic analysis of D-Alanine upon oral intake in humans
Source: PubMed Central journal article supplement (PMC11473621; doi:10.1007/s00726-024-03421-6), 2024-10-14
Supplement: 726_2024_3421_MOESM1_ESM.pdf [file 726_2024_3421_MOESM1_ESM.pdf]

## **Supplementary Information**

### **Kinetic analysis of D-alanine upon oral intake in humans**

This PDF file includes:

Supplementary Figures S1–S5

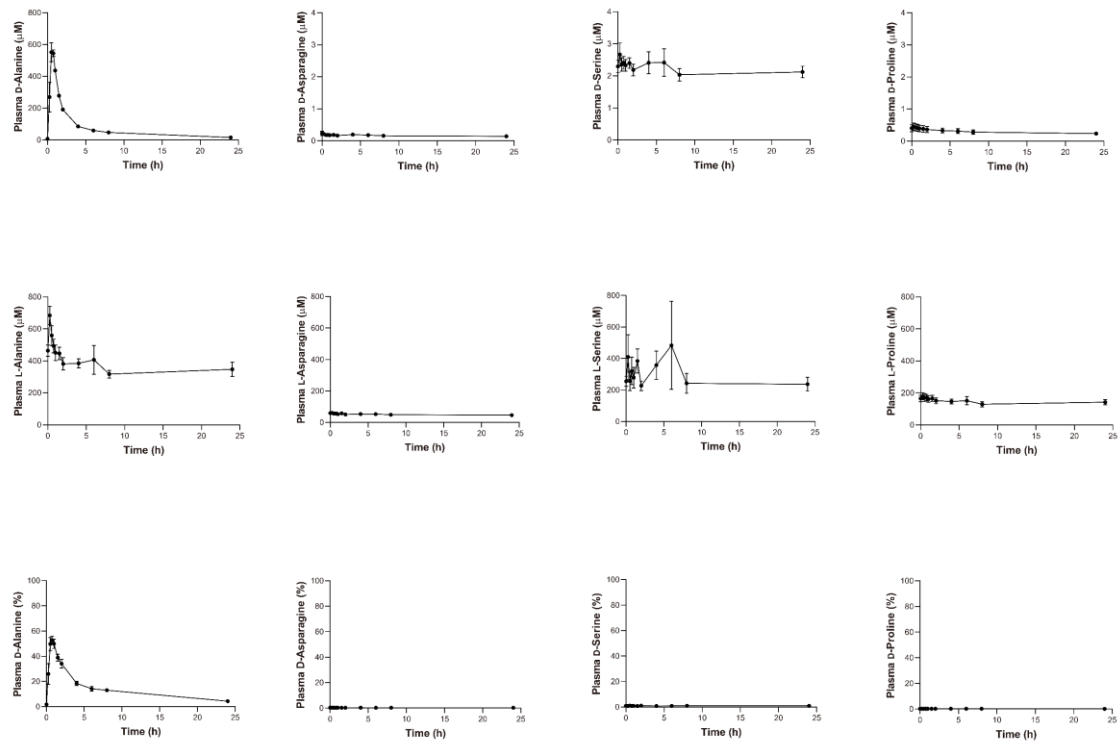

Supplementary Figure S1. Plasma D-amino acid levels or ratios after oral uptake of low dose of D-alanine.

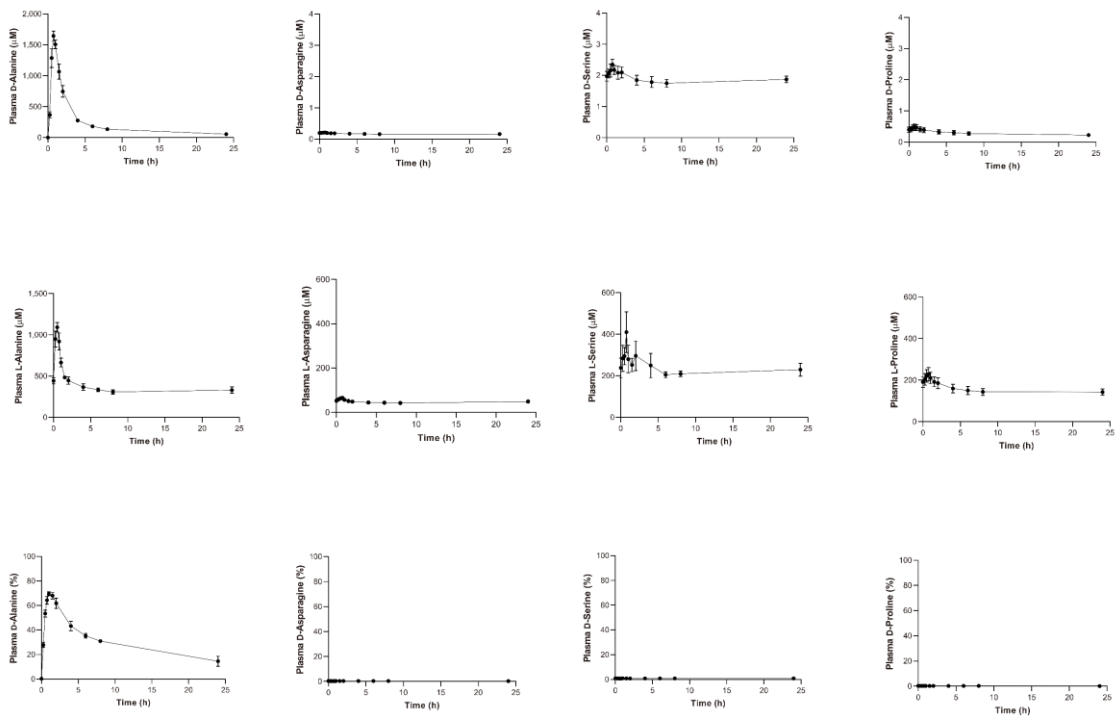

Supplementary Figure S2. Plasma D-amino acid levels or ratios after oral uptake of high dose of D-alanine.

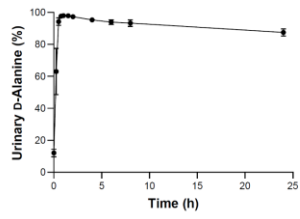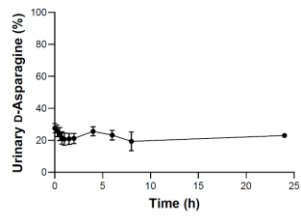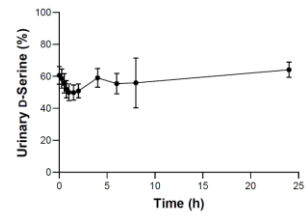

Supplementary Figure S3. Urine D-amino acid levels or ratios after oral uptake of low dose of D-alanine.

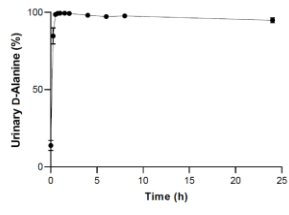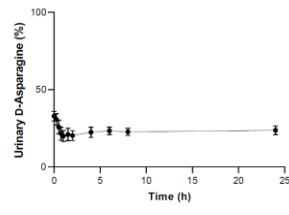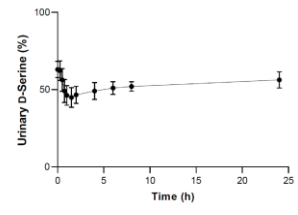

Supplementary Figure S4. Urine D-amino acid levels or ratios after oral uptake of high dose of D-alanine.

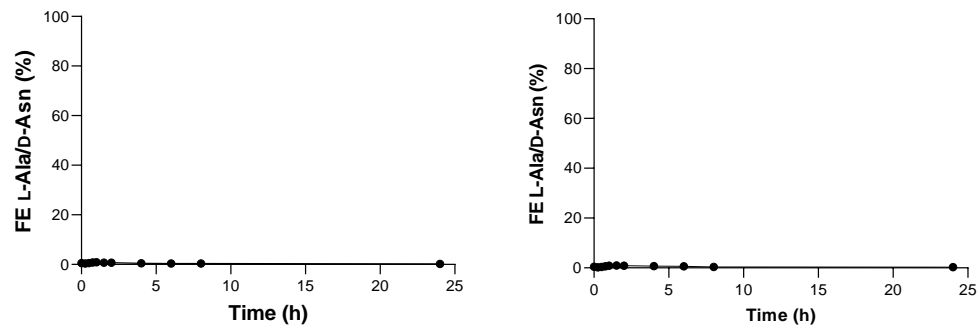

Supplementary Figure 5. Urinary fractional excretion (FE) of L-alanine after oral uptake. (A) Low dose. (B) High dose. FE is calculated using D-asparagine as references.
